# Supplementary material
Source: PubMed Central journal article supplement (PMC1618383)

## Supplementary Information

### Supplementary Figures

**Figure S1.** KEN-box independent cdc20 degradation in oocytes. GV-arrested oocytes were microinjected with cRNA to GFP (n=10, black); cdc20-GFP (n=18, red) or  $\Delta^{KEN}$ cdc20-GFP (n=16, blue). Allowing 2-3 h for expression, oocytes were then microinjected with an antisense-GFP oligonucleotide (AS) to block further cRNA translation. Plot of mean GFP levels, with standard errors, as a fluorescence reading at time t, expressed a quotient with respect to time 0 h. a,b; denotes significantly different fluorescence at the 14 h timepoint ( $p < 0.05$  Chi-squared test).

**Figure S2.** Recovery of KEN-box mediated cdc20 degradation by cdh1 following cdh1 morpholino knockdown. GV-arrested oocytes were microinjected with  $^{MO}$ cdh1 and cultured for 24 h. Cdc20<sup>1-154</sup>-GFP, which contains the KEN box but not the CRY box, was then expressed in these oocytes by microinjection of its cRNA. Plot of mean GFP levels, with standard errors, as a fluorescence reading at time t, expressed a quotient with respect to time 0 h in oocytes following either addition of cycloheximide (CHX; n=12, grey) or cdh1 cRNA (n=11, blue). a, b; denotes significantly different fluorescence at the 16 h timepoint ( $p < 0.05$  Chi-squared test).

# Reis\_Supplementary Fig S1

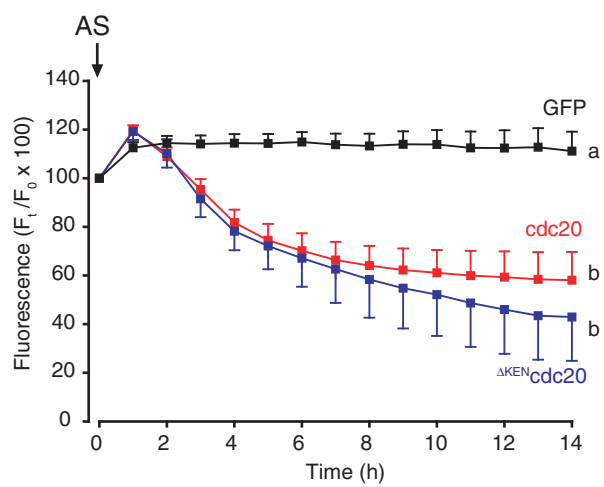

## Reis\_Supplementary Fig S2

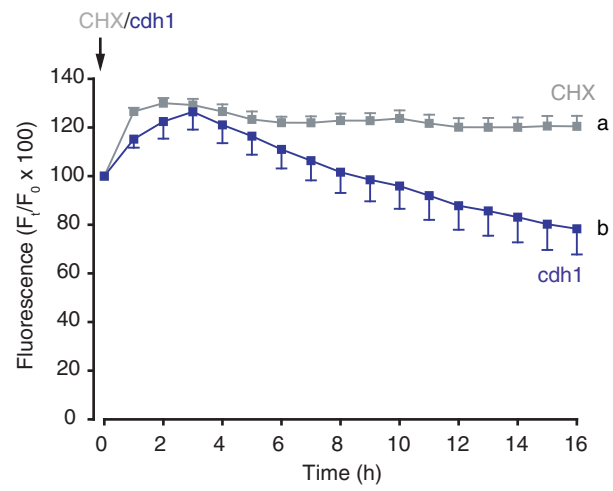

Supplement: 7400772-s1.pdf [file 7400772-s1.pdf]
